# Supplementary material for: Qualitative and Quantitative Detection of Potentially Virulent Vibrio parahaemolyticus in Drinking Water and Commonly Consumed Aquatic Products by Loop-Mediated Isothermal Amplification
Source: MDPI journal article supplement (doi:10.3390/pathogens11010010), 2021-12-22
Supplement: s1 [file s1]

**Table S1.** Bacterial strains and media used in this study

| Strain                                | Genotype                      | Source              | Medium      |
|---------------------------------------|-------------------------------|---------------------|-------------|
| <i>V. parahaemolyticus</i> ATCC17802  | <i>opaR, vpadF, ureC, tlh</i> | ATCC, United States | TSB         |
| <i>V. parahaemolyticus</i> B1-22      | <i>opaR, vpadF, tlh</i>       | LS-SHOU, China      | TSB         |
| <i>V. parahaemolyticus</i> B3-8       | <i>opaR, vpadF, tlh</i>       | LS-SHOU, China      | TSB         |
| <i>V. parahaemolyticus</i> B4-13      | <i>opaR, vpadF, tlh</i>       | LS-SHOU, China      | TSB         |
| <i>V. parahaemolyticus</i> B4-28      | <i>opaR, vpadF, tlh</i>       | LS-SHOU, China      | TSB         |
| <i>V. parahaemolyticus</i> B6-13      | <i>opaR, tlh</i>              | LS-SHOU, China      | TSB         |
| <i>V. parahaemolyticus</i> B7-16      | <i>opaR, vpadF, tlh</i>       | LS-SHOU, China      | TSB         |
| <i>V. parahaemolyticus</i> B9-31      | <i>opaR, vpadF, tlh</i>       | LS-SHOU, China      | TSB         |
| <i>V. parahaemolyticus</i> B9-42      | <i>opaR, vpadF, tlh</i>       | LS-SHOU, China      | TSB         |
| <i>V. parahaemolyticus</i> B10-61     | <i>opaR, vpadF, tlh</i>       | LS-SHOU, China      | TSB         |
| <i>V. parahaemolyticus</i> B11-3      | <i>opaR, vpadF, tlh</i>       | LS-SHOU, China      | TSB         |
| <i>V. parahaemolyticus</i> L5-1       | <i>opaR, vpadF, tlh</i>       | LS-SHOU, China      | TSB         |
| <i>V. parahaemolyticus</i> L7-7       | <i>opaR, vpadF, tlh</i>       | LS-SHOU, China      | TSB         |
| <i>V. parahaemolyticus</i> L7-45      | <i>opaR, vpadF, tlh</i>       | LS-SHOU, China      | TSB         |
| <i>V. parahaemolyticus</i> L10-15     | <i>opaR, vpadF, tlh</i>       | LS-SHOU, China      | TSB         |
| <i>V. parahaemolyticus</i> N2-8       | <i>opaR, vpadF, tlh</i>       | LS-SHOU, China      | TSB         |
| <i>V. parahaemolyticus</i> N2-11      | <i>opaR, vpadF, tlh</i>       | LS-SHOU, China      | TSB         |
| <i>V. parahaemolyticus</i> N2-20      | <i>opaR, vpadF, tlh</i>       | LS-SHOU, China      | TSB         |
| <i>V. parahaemolyticus</i> N2-25      | <i>opaR, tlh</i>              | LS-SHOU, China      | TSB         |
| <i>V. parahaemolyticus</i> N3-2       | <i>opaR, vpadF, tlh</i>       | LS-SHOU, China      | TSB         |
| <i>V. parahaemolyticus</i> N3-3       | <i>opaR, vpadF, tlh</i>       | LS-SHOU, China      | TSB         |
| <i>V. parahaemolyticus</i> N3-11      | <i>opaR, vpadF, tlh</i>       | LS-SHOU, China      | TSB         |
| <i>V. parahaemolyticus</i> N3-13      | <i>opaR, vpadF, tlh</i>       | LS-SHOU, China      | TSB         |
| <i>V. parahaemolyticus</i> N3-29      | <i>opaR, vpadF, tlh</i>       | LS-SHOU, China      | TSB         |
| <i>V. parahaemolyticus</i> N3-30      | <i>opaR, vpadF, tlh</i>       | LS-SHOU, China      | TSB         |
| <i>V. parahaemolyticus</i> N3-32      | <i>opaR, vpadF, tlh</i>       | LS-SHOU, China      | TSB         |
| <i>V. parahaemolyticus</i> N3-33      | <i>opaR, tlh</i>              | LS-SHOU, China      | TSB         |
| <i>V. parahaemolyticus</i> N4-9       | <i>opaR, vpadF, tlh</i>       | LS-SHOU, China      | TSB         |
| <i>V. parahaemolyticus</i> N4-26      | <i>opaR, vpadF, tlh</i>       | LS-SHOU, China      | TSB         |
| <i>V. parahaemolyticus</i> N4-31      | <i>opaR, vpadF, tlh</i>       | LS-SHOU, China      | TSB         |
| <i>V. parahaemolyticus</i> N4-46      | <i>opaR, vpadF, tlh</i>       | LS-SHOU, China      | TSB         |
| <i>V. parahaemolyticus</i> N5-15      | <i>opaR, vpadF, tlh</i>       | LS-SHOU, China      | TSB         |
| <i>V. parahaemolyticus</i> N6-7       | <i>opaR, vpadF, tlh</i>       | LS-SHOU, China      | TSB         |
| <i>V. parahaemolyticus</i> N6-10      | <i>opaR, vpadF, tlh</i>       | LS-SHOU, China      | TSB         |
| <i>V. parahaemolyticus</i> N6-16      | <i>opaR, vpadF, tlh</i>       | LS-SHOU, China      | TSB         |
| <i>V. parahaemolyticus</i> N6-26      | <i>opaR, vpadF, tlh</i>       | LS-SHOU, China      | TSB         |
| <i>V. parahaemolyticus</i> N7-3       | <i>opaR, tlh</i>              | LS-SHOU, China      | TSB         |
| <i>V. parahaemolyticus</i> N7-9       | <i>opaR, vpadF, tlh</i>       | LS-SHOU, China      | TSB         |
| <i>V. parahaemolyticus</i> N7-45      | <i>opaR, vpadF, tlh</i>       | LS-SHOU, China      | TSB         |
| <i>V. parahaemolyticus</i> N7-69      | <i>opaR, vpadF, tlh</i>       | LS-SHOU, China      | TSB         |
| <i>V. parahaemolyticus</i> N8-9       | <i>opaR, vpadF, tlh</i>       | LS-SHOU, China      | TSB         |
| <i>V. parahaemolyticus</i> N8-13      | <i>opaR, vpadF, tlh</i>       | LS-SHOU, China      | TSB         |
| <i>V. parahaemolyticus</i> N8-35      | <i>opaR, vpadF, tlh</i>       | LS-SHOU, China      | TSB         |
| <i>V. parahaemolyticus</i> N9-24      | <i>opaR, vpadF, tlh</i>       | LS-SHOU, China      | TSB         |
| <i>V. parahaemolyticus</i> N9-31      | <i>opaR, vpadF, tlh</i>       | LS-SHOU, China      | TSB         |
| <i>V. parahaemolyticus</i> N10-20     | <i>opaR, vpadF, tlh</i>       | LS-SHOU, China      | TSB         |
| <i>V. parahaemolyticus</i> N10-48     | <i>opaR, tlh</i>              | LS-SHOU, China      | TSB         |
| <i>V. parahaemolyticus</i> Q5-6       | <i>opaR, vpadF, tlh</i>       | LS-SHOU, China      | TSB         |
| <i>V. parahaemolyticus</i> Q8-2       | <i>opaR, vpadF</i>            | LS-SHOU, China      | TSB         |
| <i>V. parahaemolyticus</i> Q8-7       | <i>opaR, vpadF, tlh</i>       | LS-SHOU, China      | TSB         |
| <i>V. parahaemolyticus</i> Q8-15      | <i>opaR, vpadF, tlh</i>       | LS-SHOU, China      | TSB         |
| <i>Vibrio alginolyticus</i> ATCC17749 | -                             | ATCC, United States | TSB         |
| <i>Vibrio alginolyticus</i> ATCC33787 | -                             | ATCC, United States | TSB         |
| <i>Vibrio fluvialis</i> ATCC33809     | -                             | ATCC, United States | Marine 2216 |
| <i>Vibrio harvey</i> ATCC BAA-1117    | -                             | ATCC, United States | Marine 2216 |

|                                                                 |   |                     |             |
|-----------------------------------------------------------------|---|---------------------|-------------|
| <i>Vibrio harvey</i> ATCC33842                                  | - | ATCC, United States | Marine 2216 |
| <i>Vibrio metschnikovii</i> ATCC 700040                         | - | ATCC, United States | Marine 2216 |
| <i>Vibrio mimicus</i> bio-56759                                 | - | Biobw, China        | TSB         |
| <i>Vibrio vulnificus</i> ATCC27562                              | - | ATCC, United States | TSB         |
| <i>Vibrio vulnificus</i>                                        | - | DL, China           | LB          |
| <i>Aeromonas hydrophila</i> ATCC35654                           | - | ATCC, United States | TSB         |
| <i>Aeromonas hydrophila</i>                                     | - | -                   | LB          |
| <i>Enterobacter cloacae</i> ATCC13047                           | - | ATCC, United States | TSB         |
| <i>Enterobacter cloacae</i>                                     | - | SJAM, China         | LB          |
| <i>Escherichia coli</i> ATCC8739                                | - | ATCC, United States | TSB         |
| <i>Escherichia coli</i> ATCC25922                               | - | ATCC, United States | LB          |
| <i>Escherichia coli</i> K12                                     | - | IIM, China          | TSB         |
| <i>Enterobacter sakazakii</i> CMCC45401                         | - | Biobw, China        | TSB         |
| <i>Klebsiella oxytoca</i> 0707-27                               | - | LS-SHOU, China      | EE          |
| <i>Klebsiella pneumoniae</i> 0717-1                             | - | LS-SHOU, China      | EE          |
| <i>Klebsiella pneumoniae</i> 1202                               | - | LS-SHOU, China      | EE          |
| <i>Klebsiella variicola</i> 0710-01                             | - | LS-SHOU, China      | EE          |
| <i>Lactobacillus casei</i> D31                                  | - | LS-SHOU, China      | MRS         |
| <i>Lactobacillus casei</i> T9                                   | - | LS-SHOU, China      | MRS         |
| <i>Lactobacillus casei</i> K17                                  | - | LS-SHOU, China      | MRS         |
| <i>Listeria monocytogenes</i> ATCC19115                         | - | ATCC, United States | BHI         |
| <i>Pseudomonas aeruginosa</i> ATCC9027                          | - | ATCC, United States | TSB         |
| <i>Pseudomonas aeruginosa</i> ATCC27853                         | - | ATCC, United States | TSB         |
| <i>Salmonella enterica</i> subsp.<br>Enterica-Leminor et popoff | - | ATCC, United States | TSB         |
| ATCC13312                                                       |   |                     |             |
| <i>Staphylococcus aureus</i> ATCC 25923                         | - | ATCC, United States | TSB         |
| <i>Staphylococcus aureus</i> ATCC 8095                          | - | ATCC, United States | TSB         |
| <i>Staphylococcus aureus</i> ATCC29213                          | - | ATCC, United States | TSB         |
| <i>Staphylococcus aureus</i> ATCC6538                           | - | ATCC, United States | TSB         |
| <i>Staphylococcus aureus</i> ATCC6538P                          | - | ATCC, United States | TSB         |
| <i>Shigella dysenteriae</i> CMCC51252                           | - | ATCC, United States | TSB         |
| <i>Salmonella</i> spp.                                          | - | -                   | TSB         |
| <i>Shigella flexneri</i> CMCC51572                              | - | GCCC, China         | TSB         |
| <i>Shigella flexneri</i> ATCC12022                              | - | ATCC, United States | TSB         |
| <i>Shigella flexneri</i> CMCC51574                              | - | GCCC, China         | TSB         |
| <i>Salmonella paratyphi</i> -ACMCC50093                         | - | GCCC, China         | TSB         |
| <i>Shigella sonnei</i> ATCC25931                                | - | ATCC, United States | TSB         |
| <i>Shigella sonnet</i> CMCC51592                                | - | GCCC, China         | TSB         |
| <i>Salmonella typhimurium</i> ATCC15611                         | - | ATCC, United States | TSB         |
| <i>Staphylococcus aureus</i>                                    | - | -                   | LB          |
| <i>V.cholerae</i> ATCC39315                                     | - | ATCC, United States | *           |
| <i>V.cholerae</i> GIM1.449                                      | - | GCCC, China         | TSB         |
| <i>V.cholerae</i> 805-38                                        | - | LS-SHOU, China      | TSB         |
| <i>V.cholerae</i> 717-01                                        | - | LS-SHOU, China      | TSB         |
| <i>V.cholerae</i> 805-29                                        | - | LS-SHOU, China      | TSB         |
| <i>V.cholerae</i> 805-32                                        | - | LS-SHOU, China      | TSB         |
| <i>V.cholerae</i> 717-25                                        | - | LS-SHOU, China      | TSB         |

\* , genomic DNA available. -, unknown. ATCC: American Type Culture Collection, United States; DL: Dishui Lake, Shanghai, China; GCCC, Guangdong Culture Collection Center, Guangzhou, China; IIM, Institute of Industrial Microbiology, Shanghai, China; LS-SHOU, Laboratory stock, Shanghai Ocean University, Shanghai, China; SJAM, Shanghai Jiangyang Aquatic Market, Shanghai, China; Virulence-associated gene : *opaR*, *vpadF*, *ureC*, and *tlh*.

**Table S2.** Target gene sequences in some representative *V. parahaemolyticus* strains used in this study.

| <i>V. Parahaemolyticus</i><br>strain | Gene        | NCBI accession<br>number | <i>V. Parahaemolyticus</i><br>strain | Gene         | NCBI accession<br>number |
|--------------------------------------|-------------|--------------------------|--------------------------------------|--------------|--------------------------|
| B1-22                                | <i>opaR</i> | MZ819080                 | N4-26                                | <i>tlh</i>   | OL409136                 |
| B3-8                                 | <i>opaR</i> | OK490369                 | N7-19                                | <i>tlh</i>   | OL409137                 |
| B4-13                                | <i>opaR</i> | OL362198                 | N8-9                                 | <i>tlh</i>   | OL409138                 |
| B4-28                                | <i>opaR</i> | OL362204                 | N8-13                                | <i>tlh</i>   | OL409139                 |
| B7-16                                | <i>opaR</i> | OL362205                 | N8-36                                | <i>tlh</i>   | OL409140                 |
| B9-42                                | <i>opaR</i> | OL362199                 | N4-31                                | <i>tlh</i>   | OL409141                 |
| B10-61                               | <i>opaR</i> | OL362206                 | N7-3                                 | <i>tlh</i>   | OL409142                 |
| B11-3                                | <i>opaR</i> | OL362200                 | N7-9                                 | <i>tlh</i>   | OL409143                 |
| L7-45                                | <i>opaR</i> | OL362201                 | N7-45                                | <i>tlh</i>   | OL409144                 |
| L10-15                               | <i>opaR</i> | OL362202                 | N9-24                                | <i>tlh</i>   | OL409145                 |
| N2-8                                 | <i>opaR</i> | OL362207                 | N9-31                                | <i>tlh</i>   | OL409146                 |
| N2-11                                | <i>opaR</i> | OL362203                 | N10-20                               | <i>tlh</i>   | OL409147                 |
| N2-20                                | <i>opaR</i> | OL422814                 | N10-48                               | <i>tlh</i>   | OL409148                 |
| N3-13                                | <i>opaR</i> | OL422815                 | B4-28                                | <i>vpadF</i> | OL409149                 |
| N3-32                                | <i>opaR</i> | OL422816                 | N4-9                                 | <i>vpadF</i> | OL409150                 |
| N3-33                                | <i>opaR</i> | OL422817                 | N7-9                                 | <i>vpadF</i> | OL409151                 |
| N6-10                                | <i>opaR</i> | OL422818                 | L5-1                                 | <i>vpadF</i> | OL409152                 |
| N9-31                                | <i>opaR</i> | OL422819                 | L7-7                                 | <i>vpadF</i> | OL409153                 |
| Q5-6                                 | <i>opaR</i> | OL422820                 | N3-2                                 | <i>vpadF</i> | OL409154                 |
| Q8-15                                | <i>opaR</i> | OL422821                 | N3-13                                | <i>vpadF</i> | OL409155                 |
| B6-13                                | <i>tlh</i>  | OL409129                 | N3-30                                | <i>vpadF</i> | OL409156                 |
| L7-7                                 | <i>tlh</i>  | OL409130                 | N4-31                                | <i>vpadF</i> | OL409157                 |
| L7-45                                | <i>tlh</i>  | OL409131                 | N4-46                                | <i>vpadF</i> | OL409158                 |
| N2-25                                | <i>tlh</i>  | OL409132                 | N6-26                                | <i>vpadF</i> | OL409159                 |
| N3-2                                 | <i>tlh</i>  | OL409133                 | N7-19                                | <i>vpadF</i> | OL409160                 |
| N3-3                                 | <i>tlh</i>  | OL409134                 | ATCC17802                            | <i>ureC</i>  | CP014047.2               |
| N4-9                                 | <i>tlh</i>  | OL409135                 |                                      |              |                          |
